# Supplementary material for: Development of Machine Learning Algorithms for Predicting Vitamin B12 Levels Using Biochemical Analyte Data
Source: Research Square preprint supplement (doi:10.21203/rs.3.rs-8176315/v1), 2026-01-02
Supplement: Supplementary file 1 [file 6901616f5b6d8c73536edfb3.xlsx]

## Sheet: Sheet1
feature	group	definition	interpretation
AGE	DEMO	Age (years)	Continuous variable (years): patient age.
GLUCOSE_LOW	GLUCOSE	GLUCOSE==LOW	Binary (0/1): 1 → test value is low (below reference), 0 → otherwise.
GLUCOSE_HIGH	GLUCOSE	GLUCOSE==HIGH	Binary (0/1): 1 → test value is high (above reference), 0 → otherwise.
GLUCOSE_ABN	GLUCOSE	GLUCOSE!=NORMAL	Binary (0/1): 1 → test value is abnormal (low or high), 0 → within normal range.
GLUCOSE_SCORE	GLUCOSE	weights: LOW=-1.0, NORMAL=0, HIGH=1.0	Numeric (-1 / 0 / +1): -1 = low, 0 = normal, +1 = high.
FOLATE_LOW	FOLATE	FOLATE==LOW	Binary (0/1): 1 → test value is low (below reference), 0 → otherwise.
FOLATE_HIGH	FOLATE	FOLATE==HIGH	Binary (0/1): 1 → test value is high (above reference), 0 → otherwise.
FOLATE_ABN	FOLATE	FOLATE!=NORMAL	Binary (0/1): 1 → test value is abnormal (low or high), 0 → within normal range.
FOLATE_SCORE	FOLATE	weights: LOW=-1.0, NORMAL=0, HIGH=1.0	Numeric (-1 / 0 / +1): -1 = low, 0 = normal, +1 = high.
FERRITIN_LOW	FERRITIN	FERRITIN==LOW	Binary (0/1): 1 → test value is low (below reference), 0 → otherwise.
FERRITIN_HIGH	FERRITIN	FERRITIN==HIGH	Binary (0/1): 1 → test value is high (above reference), 0 → otherwise.
FERRITIN_ABN	FERRITIN	FERRITIN!=NORMAL	Binary (0/1): 1 → test value is abnormal (low or high), 0 → within normal range.
FERRITIN_SCORE	FERRITIN	weights: LOW=-1.0, NORMAL=0, HIGH=1.0	Numeric (-1 / 0 / +1): -1 = low, 0 = normal, +1 = high.
FT4_LOW	FT4	FT4==LOW	Binary (0/1): 1 → test value is low (below reference), 0 → otherwise.
FT4_HIGH	FT4	FT4==HIGH	Binary (0/1): 1 → test value is high (above reference), 0 → otherwise.
FT4_ABN	FT4	FT4!=NORMAL	Binary (0/1): 1 → test value is abnormal (low or high), 0 → within normal range.
FT4_SCORE	FT4	weights: LOW=-1.0, NORMAL=0, HIGH=1.0	Numeric (-1 / 0 / +1): -1 = low, 0 = normal, +1 = high.
TSH_LOW	TSH	TSH==LOW	Binary (0/1): 1 → test value is low (below reference), 0 → otherwise.
TSH_HIGH	TSH	TSH==HIGH	Binary (0/1): 1 → test value is high (above reference), 0 → otherwise.
TSH_ABN	TSH	TSH!=NORMAL	Binary (0/1): 1 → test value is abnormal (low or high), 0 → within normal range.
TSH_SCORE	TSH	weights: LOW=-1.0, NORMAL=0, HIGH=1.0	Numeric (-1 / 0 / +1): -1 = low, 0 = normal, +1 = high.
HGB_LOW	HGB	HGB==LOW	Binary (0/1): 1 → test value is low (below reference), 0 → otherwise.
HGB_HIGH	HGB	HGB==HIGH	Binary (0/1): 1 → test value is high (above reference), 0 → otherwise.
HGB_ABN	HGB	HGB!=NORMAL	Binary (0/1): 1 → test value is abnormal (low or high), 0 → within normal range.
HGB_SCORE	HGB	weights: LOW=-1.0, NORMAL=0, HIGH=1.0	Numeric (-1 / 0 / +1): -1 = low, 0 = normal, +1 = high.
NEU_LOW	NEU	NEU==LOW	Binary (0/1): 1 → test value is low (below reference), 0 → otherwise.
NEU_HIGH	NEU	NEU==HIGH	Binary (0/1): 1 → test value is high (above reference), 0 → otherwise.
NEU_ABN	NEU	NEU!=NORMAL	Binary (0/1): 1 → test value is abnormal (low or high), 0 → within normal range.
NEU_SCORE	NEU	weights: LOW=-1.0, NORMAL=0, HIGH=1.0	Numeric (-1 / 0 / +1): -1 = low, 0 = normal, +1 = high.
MPV_LOW	MPV	MPV==LOW	Binary (0/1): 1 → test value is low (below reference), 0 → otherwise.
MPV_HIGH	MPV	MPV==HIGH	Binary (0/1): 1 → test value is high (above reference), 0 → otherwise.
MPV_ABN	MPV	MPV!=NORMAL	Binary (0/1): 1 → test value is abnormal (low or high), 0 → within normal range.
MPV_SCORE	MPV	weights: LOW=-1.0, NORMAL=0, HIGH=1.0	Numeric (-1 / 0 / +1): -1 = low, 0 = normal, +1 = high.
LYM_LOW	LYM	LYM==LOW	Binary (0/1): 1 → test value is low (below reference), 0 → otherwise.
LYM_HIGH	LYM	LYM==HIGH	Binary (0/1): 1 → test value is high (above reference), 0 → otherwise.
LYM_ABN	LYM	LYM!=NORMAL	Binary (0/1): 1 → test value is abnormal (low or high), 0 → within normal range.
LYM_SCORE	LYM	weights: LOW=-1.0, NORMAL=0, HIGH=1.0	Numeric (-1 / 0 / +1): -1 = low, 0 = normal, +1 = high.
MONO_LOW	MONO	MONO==LOW	Binary (0/1): 1 → test value is low (below reference), 0 → otherwise.
MONO_HIGH	MONO	MONO==HIGH	Binary (0/1): 1 → test value is high (above reference), 0 → otherwise.
MONO_ABN	MONO	MONO!=NORMAL	Binary (0/1): 1 → test value is abnormal (low or high), 0 → within normal range.
MONO_SCORE	MONO	weights: LOW=-1.0, NORMAL=0, HIGH=1.0	Numeric (-1 / 0 / +1): -1 = low, 0 = normal, +1 = high.
WBC_LOW	WBC	WBC==LOW	Binary (0/1): 1 → test value is low (below reference), 0 → otherwise.
WBC_HIGH	WBC	WBC==HIGH	Binary (0/1): 1 → test value is high (above reference), 0 → otherwise.
WBC_ABN	WBC	WBC!=NORMAL	Binary (0/1): 1 → test value is abnormal (low or high), 0 → within normal range.
WBC_SCORE	WBC	weights: LOW=-1.0, NORMAL=0, HIGH=1.0	Numeric (-1 / 0 / +1): -1 = low, 0 = normal, +1 = high.
BASO_LOW	BASO	BASO==LOW	Binary (0/1): 1 → test value is low (below reference), 0 → otherwise.
BASO_HIGH	BASO	BASO==HIGH	Binary (0/1): 1 → test value is high (above reference), 0 → otherwise.
BASO_ABN	BASO	BASO!=NORMAL	Binary (0/1): 1 → test value is abnormal (low or high), 0 → within normal range.
BASO_SCORE	BASO	weights: LOW=-1.0, NORMAL=0, HIGH=1.0	Numeric (-1 / 0 / +1): -1 = low, 0 = normal, +1 = high.
RBC_LOW	RBC	RBC==LOW	Binary (0/1): 1 → test value is low (below reference), 0 → otherwise.
RBC_HIGH	RBC	RBC==HIGH	Binary (0/1): 1 → test value is high (above reference), 0 → otherwise.
RBC_ABN	RBC	RBC!=NORMAL	Binary (0/1): 1 → test value is abnormal (low or high), 0 → within normal range.
RBC_SCORE	RBC	weights: LOW=-1.0, NORMAL=0, HIGH=1.0	Numeric (-1 / 0 / +1): -1 = low, 0 = normal, +1 = high.
MCH_LOW	MCH	MCH==LOW	Binary (0/1): 1 → test value is low (below reference), 0 → otherwise.
MCH_HIGH	MCH	MCH==HIGH	Binary (0/1): 1 → test value is high (above reference), 0 → otherwise.
MCH_ABN	MCH	MCH!=NORMAL	Binary (0/1): 1 → test value is abnormal (low or high), 0 → within normal range.
MCH_SCORE	MCH	weights: LOW=-1.0, NORMAL=0, HIGH=1.0	Numeric (-1 / 0 / +1): -1 = low, 0 = normal, +1 = high.
MCV_LOW	MCV	MCV==LOW	Binary (0/1): 1 → test value is low (below reference), 0 → otherwise.
MCV_HIGH	MCV	MCV==HIGH	Binary (0/1): 1 → test value is high (above reference), 0 → otherwise.
MCV_ABN	MCV	MCV!=NORMAL	Binary (0/1): 1 → test value is abnormal (low or high), 0 → within normal range.
MCV_SCORE	MCV	weights: LOW=-1.0, NORMAL=0, HIGH=1.0	Numeric (-1 / 0 / +1): -1 = low, 0 = normal, +1 = high.
MCHC_LOW	MCHC	MCHC==LOW	Binary (0/1): 1 → test value is low (below reference), 0 → otherwise.
MCHC_HIGH	MCHC	MCHC==HIGH	Binary (0/1): 1 → test value is high (above reference), 0 → otherwise.
MCHC_ABN	MCHC	MCHC!=NORMAL	Binary (0/1): 1 → test value is abnormal (low or high), 0 → within normal range.
MCHC_SCORE	MCHC	weights: LOW=-1.0, NORMAL=0, HIGH=1.0	Numeric (-1 / 0 / +1): -1 = low, 0 = normal, +1 = high.
PDW_LOW	PDW	PDW==LOW	Binary (0/1): 1 → test value is low (below reference), 0 → otherwise.
PDW_HIGH	PDW	PDW==HIGH	Binary (0/1): 1 → test value is high (above reference), 0 → otherwise.
PDW_ABN	PDW	PDW!=NORMAL	Binary (0/1): 1 → test value is abnormal (low or high), 0 → within normal range.
PDW_SCORE	PDW	weights: LOW=-1.0, NORMAL=0, HIGH=1.0	Numeric (-1 / 0 / +1): -1 = low, 0 = normal, +1 = high.
PLT_LOW	PLT	PLT==LOW	Binary (0/1): 1 → test value is low (below reference), 0 → otherwise.
PLT_HIGH	PLT	PLT==HIGH	Binary (0/1): 1 → test value is high (above reference), 0 → otherwise.
PLT_ABN	PLT	PLT!=NORMAL	Binary (0/1): 1 → test value is abnormal (low or high), 0 → within normal range.
PLT_SCORE	PLT	weights: LOW=-1.0, NORMAL=0, HIGH=1.0	Numeric (-1 / 0 / +1): -1 = low, 0 = normal, +1 = high.
HCT_LOW	HCT	HCT==LOW	Binary (0/1): 1 → test value is low (below reference), 0 → otherwise.
HCT_HIGH	HCT	HCT==HIGH	Binary (0/1): 1 → test value is high (above reference), 0 → otherwise.
HCT_ABN	HCT	HCT!=NORMAL	Binary (0/1): 1 → test value is abnormal (low or high), 0 → within normal range.
HCT_SCORE	HCT	weights: LOW=-1.0, NORMAL=0, HIGH=1.0	Numeric (-1 / 0 / +1): -1 = low, 0 = normal, +1 = high.
RDW_LOW	RDW	RDW==LOW	Binary (0/1): 1 → test value is low (below reference), 0 → otherwise.
RDW_HIGH	RDW	RDW==HIGH	Binary (0/1): 1 → test value is high (above reference), 0 → otherwise.
RDW_ABN	RDW	RDW!=NORMAL	Binary (0/1): 1 → test value is abnormal (low or high), 0 → within normal range.
RDW_SCORE	RDW	weights: LOW=-1.0, NORMAL=0, HIGH=1.0	Numeric (-1 / 0 / +1): -1 = low, 0 = normal, +1 = high.
ALP_LOW	ALP	ALP==LOW	Binary (0/1): 1 → test value is low (below reference), 0 → otherwise.
ALP_HIGH	ALP	ALP==HIGH	Binary (0/1): 1 → test value is high (above reference), 0 → otherwise.
ALP_ABN	ALP	ALP!=NORMAL	Binary (0/1): 1 → test value is abnormal (low or high), 0 → within normal range.
ALP_SCORE	ALP	weights: LOW=-1.0, NORMAL=0, HIGH=1.0	Numeric (-1 / 0 / +1): -1 = low, 0 = normal, +1 = high.
CREATININE_LOW	CREATININE	CREATININE==LOW	Binary (0/1): 1 → test value is low (below reference), 0 → otherwise.
CREATININE_HIGH	CREATININE	CREATININE==HIGH	Binary (0/1): 1 → test value is high (above reference), 0 → otherwise.
CREATININE_ABN	CREATININE	CREATININE!=NORMAL	Binary (0/1): 1 → test value is abnormal (low or high), 0 → within normal range.
CREATININE_SCORE	CREATININE	weights: LOW=-1.0, NORMAL=0, HIGH=1.0	Numeric (-1 / 0 / +1): -1 = low, 0 = normal, +1 = high.
CRP_LOW	CRP	CRP==LOW	Binary (0/1): 1 → test value is low (below reference), 0 → otherwise.
CRP_HIGH	CRP	CRP==HIGH	Binary (0/1): 1 → test value is high (above reference), 0 → otherwise.
CRP_ABN	CRP	CRP!=NORMAL	Binary (0/1): 1 → test value is abnormal (low or high), 0 → within normal range.
CRP_SCORE	CRP	weights: LOW=-1.0, NORMAL=0, HIGH=1.0	Numeric (-1 / 0 / +1): -1 = low, 0 = normal, +1 = high.
IRON_LOW	IRON	IRON==LOW	Binary (0/1): 1 → test value is low (below reference), 0 → otherwise.
IRON_HIGH	IRON	IRON==HIGH	Binary (0/1): 1 → test value is high (above reference), 0 → otherwise.
IRON_ABN	IRON	IRON!=NORMAL	Binary (0/1): 1 → test value is abnormal (low or high), 0 → within normal range.
IRON_SCORE	IRON	weights: LOW=-1.0, NORMAL=0, HIGH=1.0	Numeric (-1 / 0 / +1): -1 = low, 0 = normal, +1 = high.
GENDER_BIN	GENDER	GENDER==ABN(2)	Binary (0/1): 1 → category coded as 2 (abnormal state), 0 → normal.
ALT_BIN	ALT	ALT==ABN(2)	Binary (0/1): 1 → category coded as 2 (abnormal state), 0 → normal.
AST_BIN	AST	AST==ABN(2)	Binary (0/1): 1 → category coded as 2 (abnormal state), 0 → normal.
GGT_BIN	GGT	GGT==ABN(2)	Binary (0/1): 1 → category coded as 2 (abnormal state), 0 → normal.
TBIL_BIN	TBIL	TBIL==ABN(2)	Binary (0/1): 1 → category coded as 2 (abnormal state), 0 → normal.
ALBUMIN_BIN	ALBUMIN	ALBUMIN==ABN(2)	Binary (0/1): 1 → category coded as 2 (abnormal state), 0 → normal.
PROTEIN_BIN	PROTEIN	PROTEIN==ABN(2)	Binary (0/1): 1 → category coded as 2 (abnormal state), 0 → normal.
LDH_BIN	LDH	LDH==ABN(2)	Binary (0/1): 1 → category coded as 2 (abnormal state), 0 → normal.
ANEMIA	HEMATO	HGB==LOW veya RBC==LOW veya HCT==LOW	Composite flag: clinical condition derived from combinations of underlying tests (e.g. ANEMIA = low HGB or low RBC).
MACROCYTOSIS	HEMATO	MCV==HIGH	Composite flag: clinical condition derived from combinations of underlying tests (e.g. ANEMIA = low HGB or low RBC).
INFLAM_ANY	INFLAM	CRP veya WBC/NEU/MONO HIGH	Composite flag: clinical condition derived from combinations of underlying tests (e.g. ANEMIA = low HGB or low RBC).
LIVER_ABN	LIVER	ALT/AST/GGT/ALP/TBIL HIGH	Binary (0/1): 1 → test value is abnormal (low or high), 0 → within normal range.
THYROID_ABN	THYROID	TSH or FT4 abnormal (outside normal range)	Binary (0/1): 1 → test value is abnormal (low or high), 0 → within normal range.
HEMATO_SCORE_SUM	HEMATO	HEMATO sum of scores	Sum of weighted scores for tests within the group (low = −1, high = +1).
HEMATO_SCORE_MEAN	HEMATO	HEMATO mean of scores	Mean score of tests within the group (range −1 to +1).
INFLAM_SCORE_SUM	INFLAM	INFLAM sum of scores	Sum of weighted scores for tests within the group (low = −1, high = +1).
INFLAM_SCORE_MEAN	INFLAM	INFLAM mean of scores	Mean score of tests within the group (range −1 to +1).
B12_REL_SCORE_SUM	B12_REL	B12_REL sum of scores	Sum of weighted scores for tests within the group (low = −1, high = +1).
B12_REL_SCORE_MEAN	B12_REL	B12_REL mean of scores	Mean score of tests within the group (range −1 to +1).
LIVER_SCORE_SUM	LIVER	LIVER sum of scores	Sum of weighted scores for tests within the group (low = −1, high = +1).
LIVER_SCORE_MEAN	LIVER	LIVER mean of scores	Mean score of tests within the group (range −1 to +1).
THYROID_SCORE_SUM	THYROID	THYROID sum of scores	Sum of weighted scores for tests within the group (low = −1, high = +1).
THYROID_SCORE_MEAN	THYROID	THYROID mean of scores	Mean score of tests within the group (range −1 to +1).
RENAL_SCORE_SUM	RENAL	RENAL sum of scores	Sum of weighted scores for tests within the group (low = −1, high = +1).
RENAL_SCORE_MEAN	RENAL	RENAL mean of scores	Mean score of tests within the group (range −1 to +1).
GLUCOSE_SCORE_SUM	GLUCOSE	GLUCOSE sum of scores	Sum of weighted scores for tests within the group (low = −1, high = +1).
GLUCOSE_SCORE_MEAN	GLUCOSE	GLUCOSE mean of scores	Mean score of tests within the group (range −1 to +1).
DEMO_SCORE_SUM	DEMO	DEMO sum of scores	Sum of weighted scores for tests within the group (low = −1, high = +1).
DEMO_SCORE_MEAN	DEMO	DEMO mean of scores	Mean score of tests within the group (range −1 to +1).
HEMATO_LOW_COUNT	HEMATO	HEMATO LOW count	Numeric: number of tests within the parameter group that meet the condition.
HEMATO_HIGH_COUNT	HEMATO	HEMATO HIGH count	Numeric: number of tests within the parameter group that meet the condition.
HEMATO_ABN_COUNT	HEMATO	HEMATO ABN count	Numeric: number of tests within the parameter group that meet the condition.
HEMATO_ABN_RATIO	HEMATO	HEMATO ABN ABN ratio (ABN/|HEMATO|)	Proportion (0–1): fraction of abnormal tests within the group (ABN / total).
INFLAM_LOW_COUNT	INFLAM	INFLAM LOW count	Numeric: number of tests within the parameter group that meet the condition.
INFLAM_HIGH_COUNT	INFLAM	INFLAM HIGH count	Numeric: number of tests within the parameter group that meet the condition.
INFLAM_ABN_COUNT	INFLAM	INFLAM ABN count	Numeric: number of tests within the parameter group that meet the condition.
INFLAM_ABN_RATIO	INFLAM	INFLAM ABN ABN ratio (ABN/|INFLAM|)	Proportion (0–1): fraction of abnormal tests within the group (ABN / total).
B12_REL_LOW_COUNT	B12_REL	B12_REL LOW count	Numeric: number of tests within the parameter group that meet the condition.
B12_REL_HIGH_COUNT	B12_REL	B12_REL HIGH count	Numeric: number of tests within the parameter group that meet the condition.
B12_REL_ABN_COUNT	B12_REL	B12_REL ABN count	Numeric: number of tests within the parameter group that meet the condition.
B12_REL_ABN_RATIO	B12_REL	B12_REL ABN ABN ratio (ABN/|B12_REL|)	Proportion (0–1): fraction of abnormal tests within the group (ABN / total).
LIVER_LOW_COUNT	LIVER	LIVER LOW count	Numeric: number of tests within the parameter group that meet the condition.
LIVER_HIGH_COUNT	LIVER	LIVER HIGH count	Numeric: number of tests within the parameter group that meet the condition.
LIVER_ABN_COUNT	LIVER	LIVER ABN count	Numeric: number of tests within the parameter group that meet the condition.
LIVER_ABN_RATIO	LIVER	LIVER ABN ABN ratio (ABN/|LIVER|)	Proportion (0–1): fraction of abnormal tests within the group (ABN / total).
THYROID_LOW_COUNT	THYROID	THYROID LOW count	Numeric: number of tests within the parameter group that meet the condition.
THYROID_HIGH_COUNT	THYROID	THYROID HIGH count	Numeric: number of tests within the parameter group that meet the condition.
THYROID_ABN_COUNT	THYROID	THYROID ABN count	Numeric: number of tests within the parameter group that meet the condition.
THYROID_ABN_RATIO	THYROID	THYROID ABN ABN ratio (ABN/|THYROID|)	Proportion (0–1): fraction of abnormal tests within the group (ABN / total).
RENAL_LOW_COUNT	RENAL	RENAL LOW count	Numeric: number of tests within the parameter group that meet the condition.
RENAL_HIGH_COUNT	RENAL	RENAL HIGH count	Numeric: number of tests within the parameter group that meet the condition.
RENAL_ABN_COUNT	RENAL	RENAL ABN count	Numeric: number of tests within the parameter group that meet the condition.
RENAL_ABN_RATIO	RENAL	RENAL ABN ABN ratio (ABN/|RENAL|)	Proportion (0–1): fraction of abnormal tests within the group (ABN / total).
GLUCOSE_LOW_COUNT	GLUCOSE	GLUCOSE LOW count	Numeric: number of tests within the parameter group that meet the condition.
GLUCOSE_HIGH_COUNT	GLUCOSE	GLUCOSE HIGH count	Numeric: number of tests within the parameter group that meet the condition.
GLUCOSE_ABN_COUNT	GLUCOSE	GLUCOSE ABN count	Numeric: number of tests within the parameter group that meet the condition.
GLUCOSE_ABN_RATIO	GLUCOSE	GLUCOSE ABN ABN ratio (ABN/|GLUCOSE|)	Proportion (0–1): fraction of abnormal tests within the group (ABN / total).
LIPID_LOW_COUNT	LIPID	LIPID LOW count	Numeric: number of tests within the parameter group that meet the condition.
LIPID_HIGH_COUNT	LIPID	LIPID HIGH count	Numeric: number of tests within the parameter group that meet the condition.
LIPID_ABN_COUNT	LIPID	LIPID ABN count	Numeric: number of tests within the parameter group that meet the condition.
LIPID_ABN_RATIO	LIPID	LIPID ABN ABN ratio (ABN/|LIPID|)	Proportion (0–1): fraction of abnormal tests within the group (ABN / total).
DEMO_LOW_COUNT	DEMO	DEMO LOW count	Numeric: number of tests within the parameter group that meet the condition.
DEMO_HIGH_COUNT	DEMO	DEMO HIGH count	Numeric: number of tests within the parameter group that meet the condition.
DEMO_ABN_COUNT	DEMO	DEMO ABN count	Numeric: number of tests within the parameter group that meet the condition.
DEMO_ABN_RATIO	DEMO	DEMO ABN ABN ratio (ABN/|DEMO|)	Proportion (0–1): fraction of abnormal tests within the group (ABN / total).
LOW_COUNT_ALL	GLOBAL	All parameters LOW count	Numeric: number of tests within the parameter group that meet the condition.
HIGH_COUNT_ALL	GLOBAL	All parameters HIGH count	Numeric: number of tests within the parameter group that meet the condition.
ABN_COUNT_ALL	GLOBAL	All parameters ABN count	Numeric: number of tests within the parameter group that meet the condition.
SEV_SUM_ALL	GLOBAL	HIGH-LOW ağırlıklı toplam şiddet	Derived feature: constructed using combinations of the rules defined above.
ABN_PER_YEAR	GLOBAL	ABN/AGE	Age-normalized value: age-adjusted score or frequency of abnormality.
SEV_PER_YEAR	GLOBAL	SEV_SUM_ALL/AGE	Age-normalized value: age-adjusted score or frequency of abnormality.
AGE_x_MCV_HIGH	INTERACT	AGE * MCV_HIGH	Binary (0/1): 1 → test value is high (above reference), 0 → otherwise.
AGE_x_MCV_LOW	INTERACT	AGE * MCV_LOW	Binary (0/1): 1 → test value is low (below reference), 0 → otherwise.
AGE_x_RDW_HIGH	INTERACT	AGE * RDW_HIGH	Binary (0/1): 1 → test value is high (above reference), 0 → otherwise.
AGE_x_RDW_LOW	INTERACT	AGE * RDW_LOW	Binary (0/1): 1 → test value is low (below reference), 0 → otherwise.
AGE_x_CRP_HIGH	INTERACT	AGE * CRP_HIGH	Binary (0/1): 1 → test value is high (above reference), 0 → otherwise.
AGE_x_CRP_LOW	INTERACT	AGE * CRP_LOW	Binary (0/1): 1 → test value is low (below reference), 0 → otherwise.
AGE_x_WBC_HIGH	INTERACT	AGE * WBC_HIGH	Binary (0/1): 1 → test value is high (above reference), 0 → otherwise.
AGE_x_WBC_LOW	INTERACT	AGE * WBC_LOW	Binary (0/1): 1 → test value is low (below reference), 0 → otherwise.
AGE_x_NEU_HIGH	INTERACT	AGE * NEU_HIGH	Binary (0/1): 1 → test value is high (above reference), 0 → otherwise.
AGE_x_NEU_LOW	INTERACT	AGE * NEU_LOW	Binary (0/1): 1 → test value is low (below reference), 0 → otherwise.
AGE_x_LYM_HIGH	INTERACT	AGE * LYM_HIGH	Binary (0/1): 1 → test value is high (above reference), 0 → otherwise.
AGE_x_LYM_LOW	INTERACT	AGE * LYM_LOW	Binary (0/1): 1 → test value is low (below reference), 0 → otherwise.
AGE_x_FERRITIN_HIGH	INTERACT	AGE * FERRITIN_HIGH	Binary (0/1): 1 → test value is high (above reference), 0 → otherwise.
AGE_x_FERRITIN_LOW	INTERACT	AGE * FERRITIN_LOW	Binary (0/1): 1 → test value is low (below reference), 0 → otherwise.
AGE_x_FOLATE_HIGH	INTERACT	AGE * FOLATE_HIGH	Binary (0/1): 1 → test value is high (above reference), 0 → otherwise.
AGE_x_FOLATE_LOW	INTERACT	AGE * FOLATE_LOW	Binary (0/1): 1 → test value is low (below reference), 0 → otherwise.
HEMATO_SCORE_PER_YEAR	HEMATO	HEMATO_SCORE_SUM / AGE	Age-normalized value: age-adjusted score or frequency of abnormality.
INFLAM_SCORE_PER_YEAR	INFLAM	INFLAM_SCORE_SUM / AGE	Age-normalized value: age-adjusted score or frequency of abnormality.
B12_REL_SCORE_PER_YEAR	B12_REL	B12_REL_SCORE_SUM / AGE	Age-normalized value: age-adjusted score or frequency of abnormality.
LIVER_SCORE_PER_YEAR	LIVER	LIVER_SCORE_SUM / AGE	Age-normalized value: age-adjusted score or frequency of abnormality.
THYROID_SCORE_PER_YEAR	THYROID	THYROID_SCORE_SUM / AGE	Age-normalized value: age-adjusted score or frequency of abnormality.
RENAL_SCORE_PER_YEAR	RENAL	RENAL_SCORE_SUM / AGE	Age-normalized value: age-adjusted score or frequency of abnormality.
GLUCOSE_SCORE_PER_YEAR	GLUCOSE	GLUCOSE_SCORE_SUM / AGE	Age-normalized value: age-adjusted score or frequency of abnormality.
DEMO_SCORE_PER_YEAR	DEMO	DEMO_SCORE_SUM / AGE	Age-normalized value: age-adjusted score or frequency of abnormality.
INT_HEMATO_RBC_LOW__RBC_HIGH	INTERACT	RBC_LOW * RBC_HIGH	Binary (0/1): 1 → test value is high (above reference), 0 → otherwise.
INT_HEMATO_RBC_LOW__RBC_ABN	INTERACT	RBC_LOW * RBC_ABN	Binary (0/1): 1 → test value is abnormal (low or high), 0 → within normal range.
INT_HEMATO_RBC_LOW__RBC_SCORE	INTERACT	RBC_LOW * RBC_SCORE	Numeric (-1 / 0 / +1): -1 = low, 0 = normal, +1 = high.
INT_HEMATO_RBC_LOW__HGB_LOW	INTERACT	RBC_LOW * HGB_LOW	Binary (0/1): 1 → test value is low (below reference), 0 → otherwise.
INT_HEMATO_RBC_LOW__HGB_HIGH	INTERACT	RBC_LOW * HGB_HIGH	Binary (0/1): 1 → test value is high (above reference), 0 → otherwise.
INT_HEMATO_RBC_LOW__HGB_ABN	INTERACT	RBC_LOW * HGB_ABN	Binary (0/1): 1 → test value is abnormal (low or high), 0 → within normal range.
INT_HEMATO_RBC_LOW__HGB_SCORE	INTERACT	RBC_LOW * HGB_SCORE	Numeric (-1 / 0 / +1): -1 = low, 0 = normal, +1 = high.
INT_HEMATO_RBC_LOW__HCT_LOW	INTERACT	RBC_LOW * HCT_LOW	Binary (0/1): 1 → test value is low (below reference), 0 → otherwise.
INT_HEMATO_RBC_LOW__HCT_HIGH	INTERACT	RBC_LOW * HCT_HIGH	Binary (0/1): 1 → test value is high (above reference), 0 → otherwise.
INT_HEMATO_RBC_HIGH__RBC_ABN	INTERACT	RBC_HIGH * RBC_ABN	Binary (0/1): 1 → test value is abnormal (low or high), 0 → within normal range.
INT_HEMATO_RBC_HIGH__RBC_SCORE	INTERACT	RBC_HIGH * RBC_SCORE	Numeric (-1 / 0 / +1): -1 = low, 0 = normal, +1 = high.
INT_HEMATO_RBC_HIGH__HGB_LOW	INTERACT	RBC_HIGH * HGB_LOW	Binary (0/1): 1 → test value is low (below reference), 0 → otherwise.
INT_HEMATO_RBC_HIGH__HGB_HIGH	INTERACT	RBC_HIGH * HGB_HIGH	Binary (0/1): 1 → test value is high (above reference), 0 → otherwise.
INT_HEMATO_RBC_HIGH__HGB_ABN	INTERACT	RBC_HIGH * HGB_ABN	Binary (0/1): 1 → test value is abnormal (low or high), 0 → within normal range.
INT_HEMATO_RBC_HIGH__HGB_SCORE	INTERACT	RBC_HIGH * HGB_SCORE	Numeric (-1 / 0 / +1): -1 = low, 0 = normal, +1 = high.
INT_HEMATO_RBC_HIGH__HCT_LOW	INTERACT	RBC_HIGH * HCT_LOW	Binary (0/1): 1 → test value is low (below reference), 0 → otherwise.
INT_HEMATO_RBC_HIGH__HCT_HIGH	INTERACT	RBC_HIGH * HCT_HIGH	Binary (0/1): 1 → test value is high (above reference), 0 → otherwise.
INT_HEMATO_RBC_ABN__RBC_SCORE	INTERACT	RBC_ABN * RBC_SCORE	Numeric (-1 / 0 / +1): -1 = low, 0 = normal, +1 = high.
INT_HEMATO_RBC_ABN__HGB_LOW	INTERACT	RBC_ABN * HGB_LOW	Binary (0/1): 1 → test value is low (below reference), 0 → otherwise.
INT_HEMATO_RBC_ABN__HGB_HIGH	INTERACT	RBC_ABN * HGB_HIGH	Binary (0/1): 1 → test value is high (above reference), 0 → otherwise.
INT_HEMATO_RBC_ABN__HGB_ABN	INTERACT	RBC_ABN * HGB_ABN	Binary (0/1): 1 → test value is abnormal (low or high), 0 → within normal range.
INT_HEMATO_RBC_ABN__HGB_SCORE	INTERACT	RBC_ABN * HGB_SCORE	Numeric (-1 / 0 / +1): -1 = low, 0 = normal, +1 = high.
INT_HEMATO_RBC_ABN__HCT_LOW	INTERACT	RBC_ABN * HCT_LOW	Binary (0/1): 1 → test value is low (below reference), 0 → otherwise.
INT_HEMATO_RBC_ABN__HCT_HIGH	INTERACT	RBC_ABN * HCT_HIGH	Binary (0/1): 1 → test value is high (above reference), 0 → otherwise.
INT_HEMATO_RBC_SCORE__HGB_LOW	INTERACT	RBC_SCORE * HGB_LOW	Binary (0/1): 1 → test value is low (below reference), 0 → otherwise.
INT_HEMATO_RBC_SCORE__HGB_HIGH	INTERACT	RBC_SCORE * HGB_HIGH	Binary (0/1): 1 → test value is high (above reference), 0 → otherwise.
INT_HEMATO_RBC_SCORE__HGB_ABN	INTERACT	RBC_SCORE * HGB_ABN	Binary (0/1): 1 → test value is abnormal (low or high), 0 → within normal range.
INT_HEMATO_RBC_SCORE__HGB_SCORE	INTERACT	RBC_SCORE * HGB_SCORE	Numeric (-1 / 0 / +1): -1 = low, 0 = normal, +1 = high.
INT_HEMATO_RBC_SCORE__HCT_LOW	INTERACT	RBC_SCORE * HCT_LOW	Binary (0/1): 1 → test value is low (below reference), 0 → otherwise.
INT_HEMATO_RBC_SCORE__HCT_HIGH	INTERACT	RBC_SCORE * HCT_HIGH	Binary (0/1): 1 → test value is high (above reference), 0 → otherwise.
INT_INFLAM_CRP_LOW__CRP_HIGH	INTERACT	CRP_LOW * CRP_HIGH	Binary (0/1): 1 → test value is high (above reference), 0 → otherwise.
INT_INFLAM_CRP_LOW__CRP_ABN	INTERACT	CRP_LOW * CRP_ABN	Binary (0/1): 1 → test value is abnormal (low or high), 0 → within normal range.
INT_INFLAM_CRP_LOW__CRP_SCORE	INTERACT	CRP_LOW * CRP_SCORE	Numeric (-1 / 0 / +1): -1 = low, 0 = normal, +1 = high.
INT_INFLAM_CRP_HIGH__CRP_ABN	INTERACT	CRP_HIGH * CRP_ABN	Binary (0/1): 1 → test value is abnormal (low or high), 0 → within normal range.
INT_INFLAM_CRP_HIGH__CRP_SCORE	INTERACT	CRP_HIGH * CRP_SCORE	Numeric (-1 / 0 / +1): -1 = low, 0 = normal, +1 = high.
INT_INFLAM_CRP_ABN__CRP_SCORE	INTERACT	CRP_ABN * CRP_SCORE	Numeric (-1 / 0 / +1): -1 = low, 0 = normal, +1 = high.
INT_B12_REL_FOLATE_LOW__FOLATE_HIGH	INTERACT	FOLATE_LOW * FOLATE_HIGH	Binary (0/1): 1 → test value is high (above reference), 0 → otherwise.
INT_B12_REL_FOLATE_LOW__FOLATE_ABN	INTERACT	FOLATE_LOW * FOLATE_ABN	Binary (0/1): 1 → test value is abnormal (low or high), 0 → within normal range.
INT_B12_REL_FOLATE_LOW__FOLATE_SCORE	INTERACT	FOLATE_LOW * FOLATE_SCORE	Numeric (-1 / 0 / +1): -1 = low, 0 = normal, +1 = high.
INT_B12_REL_FOLATE_LOW__IRON_LOW	INTERACT	FOLATE_LOW * IRON_LOW	Binary (0/1): 1 → test value is low (below reference), 0 → otherwise.
INT_B12_REL_FOLATE_LOW__IRON_HIGH	INTERACT	FOLATE_LOW * IRON_HIGH	Binary (0/1): 1 → test value is high (above reference), 0 → otherwise.
INT_B12_REL_FOLATE_LOW__IRON_ABN	INTERACT	FOLATE_LOW * IRON_ABN	Binary (0/1): 1 → test value is abnormal (low or high), 0 → within normal range.
INT_B12_REL_FOLATE_LOW__IRON_SCORE	INTERACT	FOLATE_LOW * IRON_SCORE	Numeric (-1 / 0 / +1): -1 = low, 0 = normal, +1 = high.
INT_B12_REL_FOLATE_LOW__FERRITIN_LOW	INTERACT	FOLATE_LOW * FERRITIN_LOW	Binary (0/1): 1 → test value is low (below reference), 0 → otherwise.
INT_B12_REL_FOLATE_LOW__FERRITIN_HIGH	INTERACT	FOLATE_LOW * FERRITIN_HIGH	Binary (0/1): 1 → test value is high (above reference), 0 → otherwise.
INT_B12_REL_FOLATE_HIGH__FOLATE_ABN	INTERACT	FOLATE_HIGH * FOLATE_ABN	Binary (0/1): 1 → test value is abnormal (low or high), 0 → within normal range.
INT_B12_REL_FOLATE_HIGH__FOLATE_SCORE	INTERACT	FOLATE_HIGH * FOLATE_SCORE	Numeric (-1 / 0 / +1): -1 = low, 0 = normal, +1 = high.
INT_B12_REL_FOLATE_HIGH__IRON_LOW	INTERACT	FOLATE_HIGH * IRON_LOW	Binary (0/1): 1 → test value is low (below reference), 0 → otherwise.
INT_B12_REL_FOLATE_HIGH__IRON_HIGH	INTERACT	FOLATE_HIGH * IRON_HIGH	Binary (0/1): 1 → test value is high (above reference), 0 → otherwise.
INT_B12_REL_FOLATE_HIGH__IRON_ABN	INTERACT	FOLATE_HIGH * IRON_ABN	Binary (0/1): 1 → test value is abnormal (low or high), 0 → within normal range.
INT_B12_REL_FOLATE_HIGH__IRON_SCORE	INTERACT	FOLATE_HIGH * IRON_SCORE	Numeric (-1 / 0 / +1): -1 = low, 0 = normal, +1 = high.
INT_B12_REL_FOLATE_HIGH__FERRITIN_LOW	INTERACT	FOLATE_HIGH * FERRITIN_LOW	Binary (0/1): 1 → test value is low (below reference), 0 → otherwise.
INT_B12_REL_FOLATE_HIGH__FERRITIN_HIGH	INTERACT	FOLATE_HIGH * FERRITIN_HIGH	Binary (0/1): 1 → test value is high (above reference), 0 → otherwise.
INT_B12_REL_FOLATE_ABN__FOLATE_SCORE	INTERACT	FOLATE_ABN * FOLATE_SCORE	Numeric (-1 / 0 / +1): -1 = low, 0 = normal, +1 = high.
INT_B12_REL_FOLATE_ABN__IRON_LOW	INTERACT	FOLATE_ABN * IRON_LOW	Binary (0/1): 1 → test value is low (below reference), 0 → otherwise.
INT_B12_REL_FOLATE_ABN__IRON_HIGH	INTERACT	FOLATE_ABN * IRON_HIGH	Binary (0/1): 1 → test value is high (above reference), 0 → otherwise.
INT_B12_REL_FOLATE_ABN__IRON_ABN	INTERACT	FOLATE_ABN * IRON_ABN	Binary (0/1): 1 → test value is abnormal (low or high), 0 → within normal range.
INT_B12_REL_FOLATE_ABN__IRON_SCORE	INTERACT	FOLATE_ABN * IRON_SCORE	Numeric (-1 / 0 / +1): -1 = low, 0 = normal, +1 = high.
INT_B12_REL_FOLATE_ABN__FERRITIN_LOW	INTERACT	FOLATE_ABN * FERRITIN_LOW	Binary (0/1): 1 → test value is low (below reference), 0 → otherwise.
INT_B12_REL_FOLATE_ABN__FERRITIN_HIGH	INTERACT	FOLATE_ABN * FERRITIN_HIGH	Binary (0/1): 1 → test value is high (above reference), 0 → otherwise.
INT_B12_REL_FOLATE_SCORE__IRON_LOW	INTERACT	FOLATE_SCORE * IRON_LOW	Binary (0/1): 1 → test value is low (below reference), 0 → otherwise.
INT_B12_REL_FOLATE_SCORE__IRON_HIGH	INTERACT	FOLATE_SCORE * IRON_HIGH	Binary (0/1): 1 → test value is high (above reference), 0 → otherwise.
INT_B12_REL_FOLATE_SCORE__IRON_ABN	INTERACT	FOLATE_SCORE * IRON_ABN	Binary (0/1): 1 → test value is abnormal (low or high), 0 → within normal range.
INT_B12_REL_FOLATE_SCORE__IRON_SCORE	INTERACT	FOLATE_SCORE * IRON_SCORE	Numeric (-1 / 0 / +1): -1 = low, 0 = normal, +1 = high.
INT_B12_REL_FOLATE_SCORE__FERRITIN_LOW	INTERACT	FOLATE_SCORE * FERRITIN_LOW	Binary (0/1): 1 → test value is low (below reference), 0 → otherwise.
INT_B12_REL_FOLATE_SCORE__FERRITIN_HIGH	INTERACT	FOLATE_SCORE * FERRITIN_HIGH	Binary (0/1): 1 → test value is high (above reference), 0 → otherwise.
GENDER_BIN	DEMO	GENDER==2	Binary (0/1): 1 → category coded as 2 (abnormal state), 0 → normal.
