# Supplementary material for: Development of Machine Learning Algorithms for Predicting Vitamin B12 Levels Using Biochemical Analyte Data
Source: Research Square preprint supplement (doi:10.21203/rs.3.rs-8176315/v1), 2026-01-02
Supplement: Supplementary file 2 [file de9f14987e4b27ab2aa907e3.docx]

SM1 Table 1. Thresholds Used for Laboratory Variable Categorization

|  |  | | Men – 1 | | Women – 2 | | Reference |
| --- | --- | --- | --- | --- | --- | --- | --- |
| No | Variable | Unit | Lower | Upper | Lower | Upper |
| 1 | B12 | pg/mL | 350,00 | 900 | 350,00 | 900 | NICE guideline 2024 |
| 2 | Glucose | mg/dL | 70,00 | 100,00 | 70,00 | 100,00 | Diabetes Res Clin Pract. 2025 Aug;226:112323. |
| 3 | Folate | ng/mL | 2,00 | 20,00 | 2,00 | 20,00 | Manual of Laboratory and Diagnostic Tests. 9th ed. Philadelphia: Lippincott |
| 4 | ALT | U/L | 0,00 | 50,00 | 0,00 | 50,00 | RRF |
| 5 | AST | U/L | 0,00 | 50,00 | 0,00 | 50,00 | RRF |
| 6 | Ferritin | ng/mL | 15,00 | 200,00 | 15,00 | 150,00 | WHO guideline on use of ferritin |
| 7 | FT4 | ng/dL | 0,93 | 1,71 | 0,93 | 1,71 | Guideline for the Diagnosis and Treatment of Thyroid Diseases by TEMD |
| 8 | TSH | µIU/mL | 0,27 | 4,20 | 0,27 | 4,20 |
| 9 | ALP | U/L | 30,00 | 120,00 | 30,00 | 120,00 | RRF |
| 10 | GGT | U/L | 0,00 | 55,00 | 0,00 | 55,00 | RRF |
| 11 | T. Bilirubin | mg/dL | 0,00 | 0,20 | 0,00 | 0,20 | RRF |
| 12 | Creatinine | mg/dL | 0,60 | 1,20 | 0,50 | 1,10 | Mosby’s Diagnostic & Laboratory Test Reference. 14th ed. |
| 13 | C-RP | mg/L | 0,00 | 5,00 | 0,00 | 5,00 | RRF |
| 14 | Albumin | g/L | 35,00 | 52,00 | 35,00 | 52,00 | RRF |
| 15 | T. Protein | g/L | 66,00 | 83,00 | 66,00 | 83,00 | RRF |
| 16 | Iron | µg/dL | 80,00 | 180,00 | 60,00 | 160,00 | Biochemistry, Iron Absorption - NBK448204 |
| 17 | LDH | U/L | 0,00 | 248,00 | 0,00 | 248,00 | RRF |
| 18 | HGB | g/dL | 13,00 | 16,50 | 12,00 | 16,00 | WHO Guideline on haemoglobin cutoffs … |
| 19 | NEU | 10³/µL | 1,78 | 5,38 | 1,78 | 5,38 | RRF |
| 20 | MPV | fL | 9,40 | 12,40 | 9,40 | 12,40 | RRF |
| 21 | LYM | 10³/µL | 1,00 | 4,80 | 1,00 | 4,80 | RRF |
| 22 | MONO | 10³/µL | 0,19 | 0,77 | 0,19 | 0,77 | RRF |
| 23 | WBC | 10³/µL | 3,91 | 8,77 | 3,91 | 8,77 | RRF |
| 24 | BASO | 10³/µL | 0,01 | 0,05 | 0,01 | 0,05 | RRF |
| 25 | RBC | 10⁶/µL | 4,18 | 5,48 | 4,18 | 5,48 | RRF |
| 26 | MCH | pg | 26,00 | 36,00 | 26,00 | 36,00 | RRF |
| 27 | MCV | fL | 80,00 | 100,00 | 80,00 | 100,00 | RRF |
| 28 | MCHC | g/dL | 32,00 | 36,00 | 32,00 | 36,00 | RRF |
| 29 | PDW | fL | 10,10 | 16,10 | 10,10 | 16,10 | RRF |
| 30 | PLT | 10³/µL | 151,00 | 304,00 | 151,00 | 304,00 | RRF |
| 31 | HCT | % | 41,00 | 49,00 | 36,00 | 48,00 | WHO Guideline on haemoglobin cutoffs … |
| 32 | RDW | % | 11,50 | 14,50 | 11,50 | 14,50 | RRF |

RRF: recommended reference intervals

SM1 Table 2. Distribution of Variables by Age and Sex in the Development Cohort and Descriptive Statistics

|  | **Men** | | | **Women** | | | **Gender** | **Age - men** | **Age - women** |
| --- | --- | --- | --- | --- | --- | --- | --- | --- | --- |
| **Variable** | **18–39** | **40–64** | **≥65** | **18–39** | **40–64** | **≥65** | **p** | **p** | **p** |
| n: 3459 | n: 5442 | n: 5207 | n: 6151 | n: 8674 | n: 6343 |
| Age | 26.93  ± 6.98 | 53.33  ± 7.05 | 74.73  ± 7.16 | 28.00  ± 6.73 | 51.90  ± 7.16 | 75.41  ± 7.62 | 0.000 | 0.000 | 0.000 |
| B12 | 244.73  ± 176.77 | 290.86  ± 240.99 | 353.10  ± 313.28 | 252.52  ± 177.79 | 294.79  ± 224.46 | 395.52  ± 345.91 | 0.000 | 0.000 | 0.000 |
| Glucose | 90.04  ± 30.06 | 112.33  ± 56.12 | 119.13  ± 58.09 | 87.53  ± 28.62 | 102.44  ± 42.77 | 119.15  ± 58.48 | 0.000 | 0.000 | 0.000 |
| Folate | 7.43  ± 3.85 | 8.27  ± 4.06 | 8.36  ± 4.63 | 8.26  ± 4.35 | 9.34  ± 4.50 | 9.76  ± 5.08 | 0.000 | 0.000 | 0.000 |
| ALT | 37.32  ± 118.86 | 35.81  ± 68.51 | 32.16  ± 124.56 | 21.75  ± 46.92 | 26.02  ± 70.37 | 24.43  ± 54.44 | 0.000 | **0.055** | 0.000 |
| AST | 31.65  ± 123.28 | 30.84  ± 49.86 | 36.71  ± 157.93 | 22.36  ± 37.76 | 25.78  ± 104.91 | 30.95  ± 125.65 | 0.000 | 0.025 | 0.000 |
| Ferritin | 231.20  ± 94.33 | 192.50  ± 78.10 | 296.83  ± 98.78 | 495.42  ± 141.13 | 494.01  ± 139.56 | 375.72  ± 115.73 | 0.000 | 0.000 | 0.000 |
| FT4 | 0.91  ± 0.17 | 0.92  ± 0.22 | 0.99  ± 0.24 | 0.88  ± 0.19 | 0.90  ± 0.21 | 1.01  ± 0.25 | 0.000 | 0.000 | 0.000 |
| TSH | 2.05  ± 1.77 | 2.07  ± 2.97 | 1.94  ± 3.22 | 2.19  ± 2.41 | 2.45  ± 2.95 | 2.42  ± 3.60 | 0.000 | 0.040 | 0.000 |
| ALP | 102.66  ± 78.69 | 89.93  ± 75.84 | 101.76  ± 121.94 | 69.09  ± 44.13 | 79.18  ± 54.50 | 91.74  ± 84.18 | 0.000 | 0.000 | 0.000 |
| GGT | 38.63  ± 82.45 | 62.33  ± 143.83 | 61.90  ± 145.96 | 20.64  ± 43.96 | 32.20  ± 75.20 | 41.47  ± 93.57 | 0.000 | 0.000 | 0.000 |
| Total Bilirubin | 0.80  ± 1.03 | 0.98  ± 1.46 | 1.13  ± 1.76 | 0.68  ± 0.76 | 0.71  ± 0.69 | 0.89  ± 1.06 | 0.000 | 0.000 | 0.000 |
| Creatinine | 1.00  ± 0.83 | 1.25  ± 1.27 | 1.51  ± 1.31 | 0.77  ± 0.51 | 0.89  ± 0.73 | 1.22  ± 1.00 | 0.000 | 0.000 | 0.000 |
| C-Reactive Protein | 6.28  ± 18.12 | 16.98  ± 39.08 | 30.40  ± 53.20 | 5.17  ± 15.82 | 10.25  ± 26.85 | 21.86  ± 42.30 | 0.000 | 0.000 | 0.000 |
| Albumin | 45.57 ± 4.58 | 41.94  ± 5.64 | 38.42  ± 6.22 | 44.09  ± 4.00 | 42.25  ± 4.18 | 39.15  ± 5.59 | 0.000 | 0.000 | 0.000 |
| Total Protein | 72.38  ± 6.07 | 71.31  ± 6.94 | 68.52  ± 7.69 | 72.62  ± 5.41 | 72.06  ± 5.72 | 69.02  ± 7.40 | 0.000 | 0.000 | 0.000 |
| Iron | 194.27  ± 149.40 | 168.06  ± 142.19 | 146.04  ± 134.18 | 204.01  ± 165.46 | 171.94  ± 154.04 | 143.58  ± 138.10 | 0.000 | 0.000 | 0.000 |
| LDH | 196.06  ± 179.63 | 226.11  ± 318.37 | 260.39  ± 552.71 | 173.14  ± 79.47 | 198.81  ± 113.36 | 241.67  ± 252.10 | 0.000 | 0.000 | 0.000 |
| HGB | 14.56  ± 1.89 | 13.92  ± 2.28 | 12.39  ± 2.36 | 12.48  ± 1.42 | 12.49  ± 1.60 | 11.73  ± 1.88 | 0.000 | 0.000 | 0.000 |
| NEU | 54.38  ± 17.09 | 55.08  ± 21.50 | 58.75  ± 24.28 | 55.82  ± 15.74 | 55.25  ± 17.66 | 57.62  ± 22.21 | **0.529** | 0.000 | 0.000 |
| MPV | 9.08  ± 1.21 | 9.19  ± 1.24 | 9.28  ± 1.29 | 9.30  ± 1.26 | 9.35  ± 1.26 | 9.47  ± 1.32 | 0.000 | 0.000 | 0.000 |
| LYM | 2.98  ± 1.14 | 2.75  ± 1.37 | 2.39  ± 1.51 | 2.99  ± 1.05 | 2.96  ± 1.14 | 2.64  ± 1.42 | 0.000 | 0.000 | 0.000 |
| MONO | 0.86  ± 0.34 | 0.85  ± 0.34 | 0.91  ± 0.47 | 0.79  ± 0.29 | 0.78  ± 0.30 | 0.84  ± 0.35 | 0.000 | 0.000 | 0.000 |
| WBC | 7.56  ± 2.62 | 8.80  ± 8.17 | 9.65  ± 13.49 | 7.30  ± 2.67 | 7.67  ± 6.27 | 8.76  ± 13.23 | 0.000 | 0.000 | 0.000 |
| BASO | 0.58  ± 0.45 | 0.73  ± 1.37 | 0.79  ± 0.83 | 0.58  ± 0.42 | 0.68  ± 0.54 | 0.80  ± 0.85 | 0.000 | 0.000 | 0.000 |
| RBC | 5.10  ± 0.62 | 4.78  ± 0.76 | 4.33  ± 0.78 | 4.48  ± 0.43 | 4.44  ± 0.54 | 4.17  ± 0.67 | 0.000 | 0.000 | 0.000 |
| MCH | 28.75  ± 2.69 | 29.65  ± 3.22 | 29.58  ± 3.56 | 28.07  ± 2.94 | 28.49  ± 3.30 | 29.01  ± 3.50 | 0.000 | 0.000 | 0.000 |
| MCV | 84.59  ± 6.40 | 87.36  ± 7.48 | 88.22  ± 8.64 | 83.97  ± 7.07 | 85.34  ± 8.17 | 87.21  ± 8.48 | 0.000 | 0.000 | 0.000 |
| MCHC | 34.00  ± 1.17 | 34.02  ± 1.31 | 33.70  ± 1.39 | 33.41  ± 1.21 | 33.39  ± 1.24 | 33.37  ± 1.38 | 0.000 | 0.000 | **0.317** |
| PDW | 15.82  ± 2.29 | 15.96  ± 2.45 | 16.44  ± 2.38 | 15.91  ± 2.15 | 15.92  ± 2.26 | 16.13  ± 2.39 | 0.000 | 0.000 | 0.000 |
| PLT | 265.15  ± 102.99 | 256.67  ± 111.1 | 247.74  ± 124.68 | 275.80  ± 89.60 | 279.55  ± 112.14 | 271.89  ± 128.65 | 0.000 | 0.000 | 0.000 |
| HCT | 42.97  ± 5.07 | 41.40  ± 6.07 | 37.65  ± 6.39 | 37.45  ± 3.75 | 37.60  ± 4.33 | 35.90  ± 5.29 | 0.000 | 0.000 | 0.000 |
| RDW | 14.08  ± 2.29 | 14.71  ± 2.96 | 16.03  ± 3.49 | 14.48  ± 2.50 | 14.91  ± 2.84 | 15.70  ± 3.20 | **0.580** | 0.000 | 0.000 |

p-men reflects within-male age-group differences; p-women reflects within-female age-group differences; p-gender tests sex-based age differences within each age category. SD: standart deviation

**SM1 Table 3. Distribution of Variables by Age and Sex in the Validation Cohort and Descriptive Statistics**

| **Variable** | **Men** | | | **Women** | | | **p – men** | **p – women** | **p- Gender** |
| --- | --- | --- | --- | --- | --- | --- | --- | --- | --- |
| **18–39** | **40–64** | **≥65** | **18–39** | **40–64** | **≥65** |
| n:4070 | n:5610 | n:4855 | n:6043 | n:7936 | n:6230 |
| Age | 21.44 ± 10.64 | 41.99 ± 20.08 | 55.12 ± 29.87 | 23.50 ± 10.16 | 43.45 ± 17.96 | 58.07 ± 28.93 | 0.000 | 0.000 | 0.000 |
| B12 | 268.20 ± 173.48 | 296.55 ± 224.76 | 338.68 ± 270.56 | 265.82 ± 169.87 | 302.59 ± 215.73 | 371.65 ± 298.54 | 0.000 | 0.000 | 0.000 |
| Glucose | 88.09 ± 29.00 | 106.28 ± 53.88 | 107.82 ± 51.08 | 85.65 ± 28.23 | 99.33 ± 44.09 | 108.86 ± 53.77 | 0.000 | 0.000 | 0.000 |
| Folate | 8.52  ± 4.68 | 8.95  ± 4.52 | 9.17  ± 5.00 | 8.78  ± 4.76 | 9.50  ± 4.69 | 10.00 ± 5.21 | 0.000 | 0.000 | 0.000 |
| ALT | 35.09 ± 110.13 | 30.11 ± 50.71 | 25.57 ± 81.55 | 21.04 ± 47.65 | 24.81 ± 69.42 | 23.70 ± 86.88 | 0.000 | 0.006 | 0.000 |
| AST | 33.86 ± 112.60 | 36.37 ± 456.95 | 30.58 ± 45.74 | 24.89 ± 48.18 | 27.20 ± 111.07 | 31.99 ± 145.57 | **0.598** | 0.001 | 0.000 |
| Ferritin | 105.14 ± 184.75 | 146.33 ± 234.77 | 148.00 ± 241.55 | 40.57 ± 89.36 | 71.36 ± 187.57 | 111.60 ± 232.21 | 0.000 | 0.000 | 0.000 |
| FT4 | 0.91  ± 0.16 | 0.90  ± 0.19 | 0.95  ± 0.21 | 0.88  ± 0.18 | 0.89  ± 0.20 | 0.96  ± 0.23 | 0.000 | 0.000 | 0.000 |
| TSH | 2.21  ± 1.75 | 2.15  ± 2.54 | 2.07  ± 2.11 | 2.23  ± 1.89 | 2.49  ± 2.87 | 2.47  ± 3.43 | 0.011 | 0.000 | 0.000 |
| HGB | 14.10 ± 1.96 | 13.73 ± 2.14 | 12.68 ± 2.12 | 12.50 ± 1.34 | 12.54 ± 1.52 | 12.03 ± 1.71 | 0.000 | 0.000 | 0.000 |
| NEU | 3.75  ± 2.03 | 4.15  ± 3.28 | 4.50  ± 5.07 | 3.88  ± 2.03 | 3.95  ± 3.43 | 4.21  ± 3.43 | 0.000 | 0.000 | 0.001 |
| MPV | 9.52  ± 1.28 | 9.61  ± 1.30 | 9.68  ± 1.37 | 9.74  ± 1.32 | 9.81  ± 1.31 | 9.89  ± 1.36 | 0.000 | 0.000 | 0.000 |
| LYM | 2.46  ± 1.24 | 2.56  ± 5.04 | 2.63  ± 9.26 | 2.30  ± 1.06 | 2.35  ± 3.13 | 2.54  ± 7.77 | **0.440** | 0.011 | 0.000 |
| MONO | 0.65  ± 0.25 | 0.69  ± 0.46 | 0.75  ± 0.75 | 0.58  ± 0.22 | 0.58  ± 0.40 | 0.66  ± 0.63 | 0.000 | 0.000 | 0.000 |
| WBC | 7.91  ± 2.66 | 8.57  ± 6.19 | 9.05  ±11.2 | 7.64  ± 2.50 | 7.80  ± 5.12 | 8.46  ± 8.85 | 0.000 | 0.000 | 0.000 |
| BASO | 0.05  ± 0.03 | 0.06  ± 0.12 | 0.07  ± 0.50 | 0.04  ± 0.03 | 0.05  ± 0.15 | 0.06  ± 0.08 | 0.005 | 0.000 | 0.000 |
| RBC | 5.07  ± 0.58 | 4.84  ± 0.68 | 4.53  ± 0.75 | 4.56  ± 0.42 | 4.52  ± 0.51 | 4.34  ± 0.64 | 0.000 | 0.000 | 0.000 |
| MCH | 27.94 ± 2.70 | 28.75 ± 3.19 | 28.55 ± 3.32 | 27.57 ± 2.76 | 28.00 ± 3.10 | 28.30 ± 3.12 | 0.000 | 0.000 | 0.000 |
| MCV | 82.84 ± 6.61 | 85.30 ± 7.74 | 85.64 ± 8.70 | 83.25 ± 6.82 | 84.58 ± 7.74 | 85.77 ± 8.26 | 0.000 | 0.000 | 0.000 |
| MCHC | 33.72 ± 1.17 | 33.75 ± 1.39 | 33.43 ± 1.36 | 33.10 ± 1.26 | 33.10 ± 1.30 | 33.09 ± 1.33 | 0.000 | **0.799** | 0.000 |
| PDW | 13.91 ± 2.98 | 14.17 ± 3.09 | 14.41 ± 3.19 | 14.19 ± 2.87 | 14.28 ± 2.89 | 14.30 ± 3.05 | 0.000 | **0.073** | 0.000 |
| PLT | 284.64 ± 99.97 | 275.16 ± 109.36 | 269.41 ± 115.59 | 294.07 ± 89.64 | 290.65 ± 104.61 | 289.37 ± 116.62 | 0.000 | 0.035 | 0.000 |
| HCT | 41.88 ± 5.31 | 41.02 ± 5.82 | 38.37 ± 5.85 | 37.81 ± 3.59 | 38.03 ± 4.14 | 36.80 ± 4.82 | 0.000 | 0.000 | 0.000 |
| RDW | 13.74 ± 1.98 | 14.22 ± 2.46 | 15.05 ± 3.06 | 14.12 ± 2.20 | 14.42 ± 2.49 | 14.81 ± 2.60 | 0.000 | 0.000 | 0.000 |
| ALP | 133.00 ± 110.37 | 119.18 ± 100.00 | 131.24 ± 114.02 | 97.34 ± 94.28 | 98.99 ± 79.63 | 112.29 ± 93.08 | 0.000 | 0.000 | 0.000 |
| GGT | 31.76 ± 66.38 | 48.74 ± 121.17 | 43.24 ± 102.25 | 18.97 ± 33.38 | 28.45 ± 72.31 | 31.64 ± 66.94 | 0.000 | 0.000 | 0.000 |
| Total Bilirubin | 0.85  ± 0.89 | 0.88  ± 1.29 | 0.93  ± 1.24 | 0.66  ± 0.55 | 0.69  ± 0.67 | 0.77  ± 0.83 | 0.003 | 0.000 | 0.000 |
| Creatinine | 0.88  ± 0.70 | 1.09  ± 1.10 | 1.20  ± 1.06 | 0.73  ± 0.46 | 0.84  ± 0.67 | 1.05  ± 0.90 | 0.000 | 0.000 | 0.000 |
| CRP | 6.64  ± 21.13 | 13.38 ± 34.50 | 19.23 ± 41.94 | 4.94  ± 13.45 | 8.15  ± 22.01 | 14.38 ± 32.77 | 0.000 | 0.000 | 0.000 |
| Albumin | 45.67 ± 4.17 | 43.23 ± 5.18 | 41.35 ± 5.92 | 44.61 ± 3.65 | 43.32 ± 4.10 | 41.56 ± 10.4 | 0.000 | 0.000 | 0.000 |
| Total Protein | 73.42 ± 5.80 | 71.92 ± 6.47 | 70.41 ± 6.93 | 73.16 ± 5.14 | 72.45 ± 5.32 | 70.82 ± 6.65 | 0.000 | 0.000 | 0.000 |
| Iron | 188.97 ± 150.29 | 176.50 ± 149.12 | 161.63 ± 143.45 | 203.46 ± 165.39 | 176.68 ± 156.26 | 152.56 ± 144.77 | 0.000 | 0.000 | 0.000 |
| LDH | 204.83 ± 160.59 | 215.98 ± 208.10 | 232.66 ± 395.01 | 179.10 ± 81.97 | 197.02 ± 113.17 | 226.55 ± 238.83 | 0.000 | 0.000 | 0.000 |

p-men reflects within-male age-group differences; p-women reflects within-female age-group differences; p-gender tests sex-based age differences within each age category. SD: standart deviation

## **SM Table 4– Experiment 1 Results (Baseline Models)**

| Model | Sensitivity | Specificity | PPV | NPV | F1 | AUC-ROC | AUC-PR | MCC |
| --- | --- | --- | --- | --- | --- | --- | --- | --- |
| CatBoost | 0.85 | 0.75 | 0.77 | 0.83 | 0.81 | 0.88 | 0.86 | 0.6 |
| XGBoost | 0.85 | 0.74 | 0.77 | 0.83 | 0.8 | 0.88 | 0.85 | 0.59 |
| ANN | 0.77 | 0.78 | 0.78 | 0.77 | 0.77 | 0.86 | 0.84 | 0.53 |
| RF | 0.84 | 0.72 | 0.75 | 0.82 | 0.79 | 0.86 | 0.82 | 0.56 |
| LR | 0.76 | 0.71 | 0.72 | 0.75 | 0.74 | 0.81 | 0.78 | 0.46 |
| SVM | 0.72 | 0.66 | 0.68 | 0.71 | 0.7 | 0.77 | 0.75 | 0.38 |
| KNN | 0.79 | 0.53 | 0.62 | 0.71 | 0.7 | 0.72 | 0.66 | 0.31 |
| DT | 0.7 | 0.72 | 0.71 | 0.7 | 0.7 | 0.71 | 0.65 | 0.36 |

## **SM Table 5 – Experiment 3 Results (Hyperparameter Tuning)**

| Model | Sensitivity | Specificity | PPV | NPV | F1 | AUC-ROC | AUC-PR | MCC |
| --- | --- | --- | --- | --- | --- | --- | --- | --- |
| CatBoost | 0.86 | 0.74 | 0.77 | 0.84 | 0.81 | 0.88 | 0.86 | 0.6 |
| XGBoost | 0.87 | 0.72 | 0.76 | 0.85 | 0.81 | 0.88 | 0.85 | 0.6 |
| ANN | 0.77 | 0.69 | 0.74 | 0.77 | 0.77 | 0.86 | 0.83 | 0.57 |
| RF | 0.83 | 0.73 | 0.75 | 0.81 | 0.79 | 0.86 | 0.82 | 0.56 |
| LR | 0.76 | 0.71 | 0.72 | 0.75 | 0.75 | 0.81 | 0.78 | 0.47 |
| SVM | 0.79 | 0.68 | 0.71 | 0.76 | 0.75 | 0.81 | 0.78 | 0.47 |
| KNN | 0.79 | 0.53 | 0.63 | 0.72 | 0.77 | 0.72 | 0.67 | 0.33 |
| DT | 0.93 | 0.51 | 0.65 | 0.87 | 0.77 | 0.76 | 0.68 | 0.48 |

## **SM Table 6 – Experiment 4 Results (Feature Engineering)**

| Model | Sensitivity | Specificity | PPV | NPV | F1 | AUC-ROC | AUC-PR | MCC |
| --- | --- | --- | --- | --- | --- | --- | --- | --- |
| CatBoost | 0.85 | 0.74 | 0.77 | 0.84 | 0.81 | 0.88 | 0.86 | 0.6 |
| XGBoost | 0.84 | 0.75 | 0.77 | 0.82 | 0.8 | 0.88 | 0.85 | 0.59 |
| SVM | 0.84 | 0.73 | 0.76 | 0.82 | 0.8 | 0.86 | 0.83 | 0.58 |
| ANN | 0.74 | 0.73 | 0.73 | 0.74 | 0.74 | 0.82 | 0.78 | 0.47 |
| KNN | 0.85 | 0.62 | 0.69 | 0.81 | 0.76 | 0.81 | 0.77 | 0.48 |
| RF | 0.82 | 0.73 | 0.75 | 0.8 | 0.76 | 0.81 | 0.77 | 0.55 |
| DT | 0.7 | 0.7 | 0.7 | 0.7 | 0.7 | 0.7 | 0.64 | 0.4 |
| LR | 0.83 | 0.72 | 0.75 | 0.81 | 0.79 | 0.86 | 0.84 | 0.55 |

**SM1 Figure 1. Local interpretable model-agnostic explanation (LIME) plot showing feature-level contributions for a single prediction made by the CatBoost classifier**


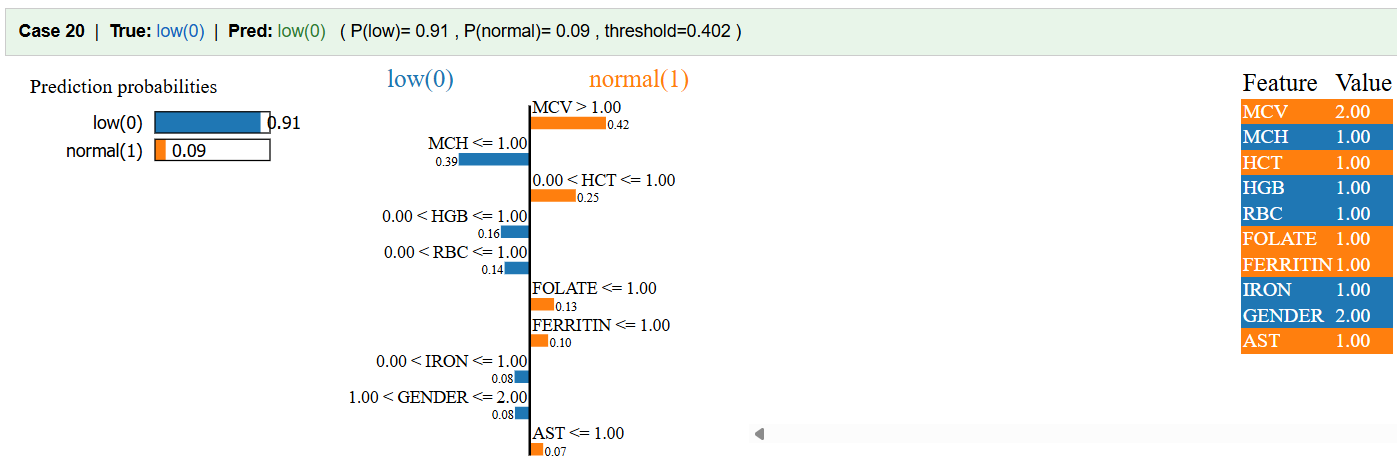


This method generates a local, case-specific interpretation by quantifying how each feature contributes to an individual prediction. Bars plotted in blue represent features that push the prediction toward the “low B12” class (negative direction), whereas bars in orange indicate features that shift the probability toward the “normal” class (positive direction). The length of each bar reflects the magnitude of its influence on the predicted class probability, and the sign (±) denotes the direction of the effect relative to the model’s decision boundary.
